# Supplementary material for: Influence of porphyrin cationic charges on photoinactivation of Candida albicans morphotypes
Source: Research Square preprint supplement (doi:10.21203/rs.3.rs-7992830/v1), 2025-11-13
Supplement: Supplementary file 1 [file 7b9ff93a4b33d285ed38f131.docx]

**Supplementary Materials**

**Influence of porphyrin cationic charges on photoinactivation of *Candida albicans* morphotypes**

María G. Alvarez1,2, Paula V. Gabrielli1, Jesica M. González1, María E. Pérez1,2, and Edgardo N. Durantini1,2,[[1]](#footnote-1)*

1 Instituto para el Desarrollo Agroindustrial y de la Salud (IDAS), Consejo Nacional de Investigaciones Científicas y Técnicas (CONICET), Ruta Nacional 36 Km 601, X5804BYA Río Cuarto, Córdoba, Argentina.

2 Departamento de Química, Facultad de Ciencias Exactas, Físico-Químicas y Naturales, Universidad Nacional de Río Cuarto, Ruta Nacional 36 Km 601, X5804BYA Río Cuarto, Córdoba, Argentina.

**Table of Contents**

**1. Materials** Page S2

**2. Instrumentation** Page S2

**3. Figures** Page S2

**4. References** Page S5

**1. Materials**

Sabouraud glucose broth and agar from Britania (Buenos Aires, Argentina) were used in yeast cultures. Microtiter plates (96-well and 24-wells) were acquired to Deltalab (Barcelona, Spain).

**2. Instrumentation**

UV-visible absorption spectra were carried out on a Shimadzu UV-2401PC spectrometer (Shimadzu Corporation, Tokyo, Japan). Fluorescence emission spectra were performed on a Spex FluoroMax spectrofluorometer (Horiba Jobin Yvon Inc, Edison, NJ, USA). A Radiometer Laser Mate-Q (Coherent, Santa Clara, CA, USA) was used to determine the light fluence rates. Cultures were irradiated with a Novamat 130 AF (Braun Photo Technik, Nürnberg, Germany) projector containing a 150 W lamp. A 2.5 cm glass cuvette filled with water without circulation was used to remove the heat from the lamp. A wavelength range between 350 and 800 nm was selected by optical filters. The projector was placed vertically with the light beam focused on the 96-well microtiter plate lid, producing a fluence rate of 90 mW/cm2 [[[2]](#endnote-2),[[3]](#endnote-3)]. Microscopic observations were made with an inverted fluorescence microscope (BIM500FL, Bioimager, ON, Canada).

**3. Figures**

**Figure S1**. Survival of *C. albicans* cell suspensions (~106 CFU/mL) incubated with 5.0 µM AB3+ (squares), A2B22+ (circles), A3B3+ (upward triangles), and A44+ (downward triangles) for 15 min at 37 °C in the dark and kept in the dark for different periods. Control of *C. albicans* untreated with PS kept in the dark (open circles).

**Figure S2**. Survival of *C. albicans* planktonic cells (∼106 CFU/mL) treated with 50 mM scavenger for 30 min at 37 °C in the dark and irradiated with white light for 15 min; (1) cells; (2) cells treated with sodium azide; (3) cells treated with DABCO; (4) cells suspended in D2O; (5) cells treated with D‑mannitol; (6) cells treated with L-cysteine.

**Figure S3**. Survival of *C. albicans* planktonic cells (∼106 CFU/mL) treated with 1.0 μM (A) A3B3+ and (B) A44+ for 30 min at 37 °C in the dark and kept in the dark for 15 min; (1) cells; (2) cells treated with PS; (3) cells treated with 50 mM sodium azide and PSs; (4) cells treated with 50 mM DABCO and PSs; (5) cells suspended in D2O and treated with PSs; (6) cells treated with 50 mM D‑mannitol and PSs; (7) cells treated with 50 mM L-cysteine and PSs.

**Figure S4**. Survival of *C. albicans* cell suspension (~106 CFU/mL) treated with 5.0 mM A3B3+ (upward triangles) and A44+ (downward triangles) for 30 min at 37 °C in the dark, plated on SA surfaces and kept in the dark for different periods.

**Figure S5**. Survival of *C. albicans* pseudohyphae (~106 CFU/mL) incubated with 5.0 µM (circles) of (A) A3B3+ and (B) A44+ for 15 min at 37 °C in the dark and kept in the dark for different periods.

**4. References**

1. * Corresponding author. *E-mail address*: edurantini@exa.unrc.edu.ar (E.N. Durantini). [↑](#footnote-ref-1)
2. . Cordero P. V., Ferreyra, D. D., Pérez, M. E., Alvarez, M. G., Durantini, E. N. (2021). Photodynamic effect of 5,10,15,20-tetrakis[4-(3-*N*,*N*-dimethylaminopropoxy)phenyl]chlorin towards the human pathogen *Candida albicans* under different culture conditions. *Photochem*,1, 505-522. [↑](#endnote-ref-2)
3. . Santamarina, S. C., Heredia, D. A., Durantini, A. M., Durantini, E. N. (2022). Antimicrobial photosensitizing material based on conjugated Zn(II) porphyrins. *Antibiotics*, 11, 91. [↑](#endnote-ref-3)
